# Supplementary material for: Gestational age and hospital admission costs from birth to childhood: a population-based record linkage study in England
Source: PubMed Central journal article supplement (PMC10447377; doi:10.1136/archdischild-2022-324763), 2023-02-09
Supplement: fetalneonatal-2022-324763supp001.pdf [file fetalneonatal-2022-324763supp001.pdf]

## Supplementary material

Title: Gestational age and hospital admission costs from birth to childhood: a population based record linkage study in England

Authors: Xinyang Hua, Stavros Petrou, Victoria Coathup, Claire Carson, Jennifer J Kurinzcuk, Maria A Quigley, Elaine Boyle, Samantha Johnson, Alison Macfarlane, Oliver Rivero-Arias

| Content                                                                                                     | Page |
|-------------------------------------------------------------------------------------------------------------|------|
| Supplementary material 1. Methods to estimate neonatal and paediatric critical care cost in birth admission | 1-4  |
| Supplemental material 2. Summary on Grouping results                                                        | 5-7  |
| Supplemental material 3. Summary on Reference Cost matching                                                 | 8    |
| Supplementary materials 4. Statistics for subsequent admissions                                             | 9-10 |

## **Supplementary material 1. Methods to estimate neonatal and paediatric critical care cost in birth admission**

### **1.1 Variables related to neonatal/paediatric critical care stay within the Hospital Episode Statistics Admitted Patient Care (HES APC) <https://digital.nhs.uk/data-and-information/data-tools-and-services/data-services/hospital-episode-statistics>**

The following variables within the HES APC provide information on neonatal critical care stay which potentially can be used in the TIGAR cohort (babies born between January 2005 and December 2006):

- Variable “neocare” which indicates level of neonatal care in each hospital episode. In specific --
  - 0 = Normal care
  - 1 = Special care
  - 2 = High dependency intensive care
  - 3 = Maximal intensive care
  - 8 = Not applicable
  - 9 = Not known
- Before 1st April 2008, there was a section about “augmented/critical care” within the HES APC, including a set of variables that can be used to estimate the number of days spent in different critical care units (Neonatal/Paediatric/Adult) in each episode. Those variables are often missing. When all the variables in the section were missing, we viewed them as with no critical care stay in the episode.

To investigate the reliability of these variables to estimate the costs of neonatal/paediatric critical care stay for the birth admission, we tried to use them to identify critical care study in the extremely preterm baby group (gestational age  $\leq 27$  week) in our cohort. The results showed that among the birth episodes for those extremely preterm babies:

Distribution of the “neocare” variable:

|                         | Percent |
|-------------------------|---------|
| 0=Normal care           | 17.7    |
| 1=Special care          | 14.2    |
| 2=Level 2 IC (high dep) | 5.5     |
| 3=Level 1 IC (max)      | 33.3    |
| 8=Not applicable        | 15.3    |
| 9=Not known             | 14.0    |
| Total                   | 100.0   |

Percentage of episodes with critical care, estimated based on the “augmented/critical care” section

|                                        | Percent |
|----------------------------------------|---------|
| Without critical care (missing values) | 94.6    |
| With critical care                     | 5.4     |
| Total                                  | 100.0   |

53% of the birth episodes using the “neocare” variable (neocare = 1,2 and 3) and 5.4% using the “augmented/critical care” section were identified as with critical care. Both of these two figures were considered low in this group of babies who were born less than  $\leq 27$  weeks.

As a result, we’ve decided that these variables could not be used for the analysis to estimate neonatal critical care costs.

## 1.2 Methods to simulate neonatal critical care (NCC) and paediatric critical care (PCC) stay and costs in birth admission

To account for costs spent in critical care units, we requested aggregated data on the number of babies admitted to neonatal critical care (from NNRD) and paediatric critical care (from PICANet), and the average days a baby spent in different levels of critical care during the birth admission by sex and gestational age at birth, in England. The average number of days was estimated for babies who were alive when discharged from either neonatal or paediatric units to maintain consistency with the TIGAR sample. We requested NNRD and PICANet data for 2017 as granular information on the level of care required to generate Healthcare Resource Group (HRG) codes, which was essential for the costing, was not available in the PICANet data in earlier years.

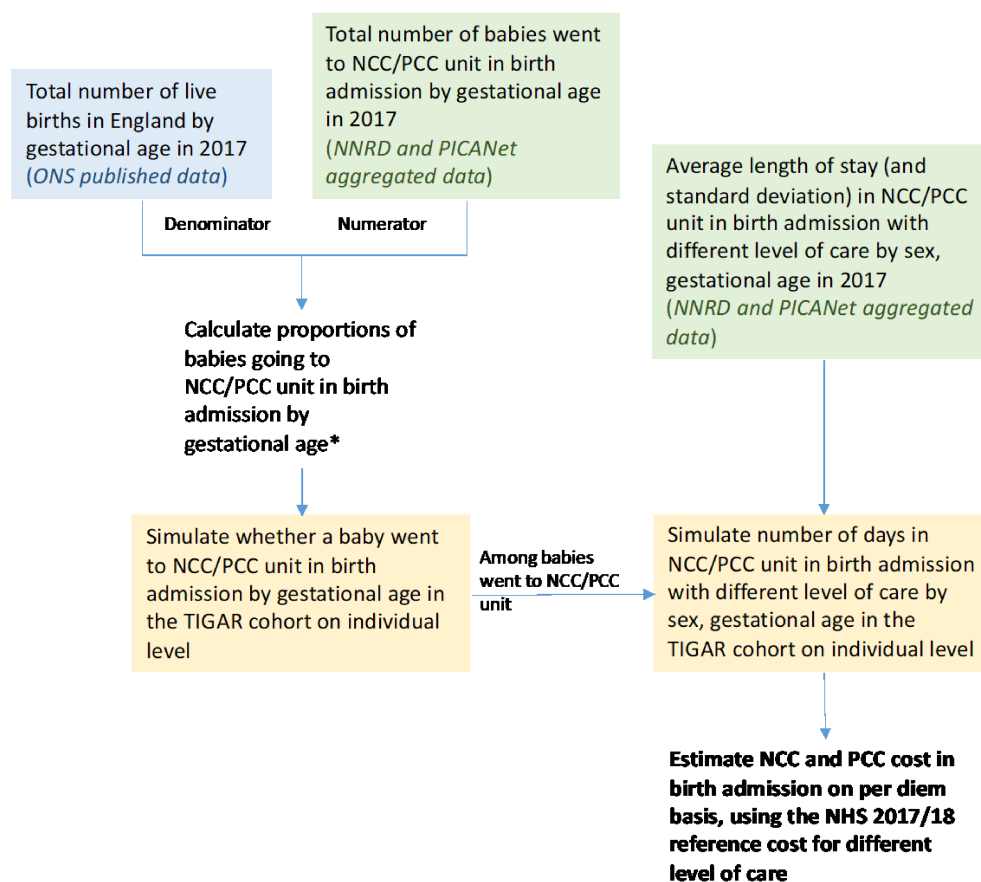

\*for GA  $\leq$  33 week, assume 100% went to NCC. This is higher than the %s calculated using the ONS and NNRD aggregated data and can be explained by high risk of live births dying in the delivery room before being able to be transferred to NCC in these very preterm groups (Costeloe et al. 2012. BMJ). In TIGAR all babies were alive when discharged from birth admission, so we assumed 100% of these early term babies in TIGAR went to NCC unit.

### 1.3 Methods to adjust non-critical care cost

First calculate average total NCC and PCC days during the birth admission by gestational age among the entire TIGAR cohort.

Then for each gestational week group, adjust the non-critical care (ward) cost during birth admission as:

$$\text{Days}_{\text{GAX.wards}} = \text{Days}_{\text{GAX.hosp}} - \text{Days}_{\text{GAX.NCC}} - \text{Days}_{\text{GAX.PCC}}$$

$$\text{Cost}_{\text{GAX.wards}} = \text{Cost}_{\text{GAX.hops}} * \text{Days}_{\text{GAX.wards}} / \text{Days}_{\text{GAX.hosp}}$$

where—

$\text{Days}_{\text{GAX.hosp}}$  is the average total hospital days during birth admission for gestational age group X;

$\text{Days}_{\text{GAX.NCC}}$  is the average total NCC days during birth admission for gestational age group X;

$\text{Days}_{\text{GAX.PCC}}$  is the average total PCC days during birth admission for gestational age group X;

$\text{Cost}_{\text{GAX.hops}}$  is the average total hospital cost for gestational age group X when assuming all the hospital stay were in wards, calculated from the Grouper (<https://digital.nhs.uk/services/national-casemix-office/downloads-grouper-and-tools/costing---hrg4-2018-19-reference-costs-grouper>)

## Supplemental material 2. Summary on Grouping results

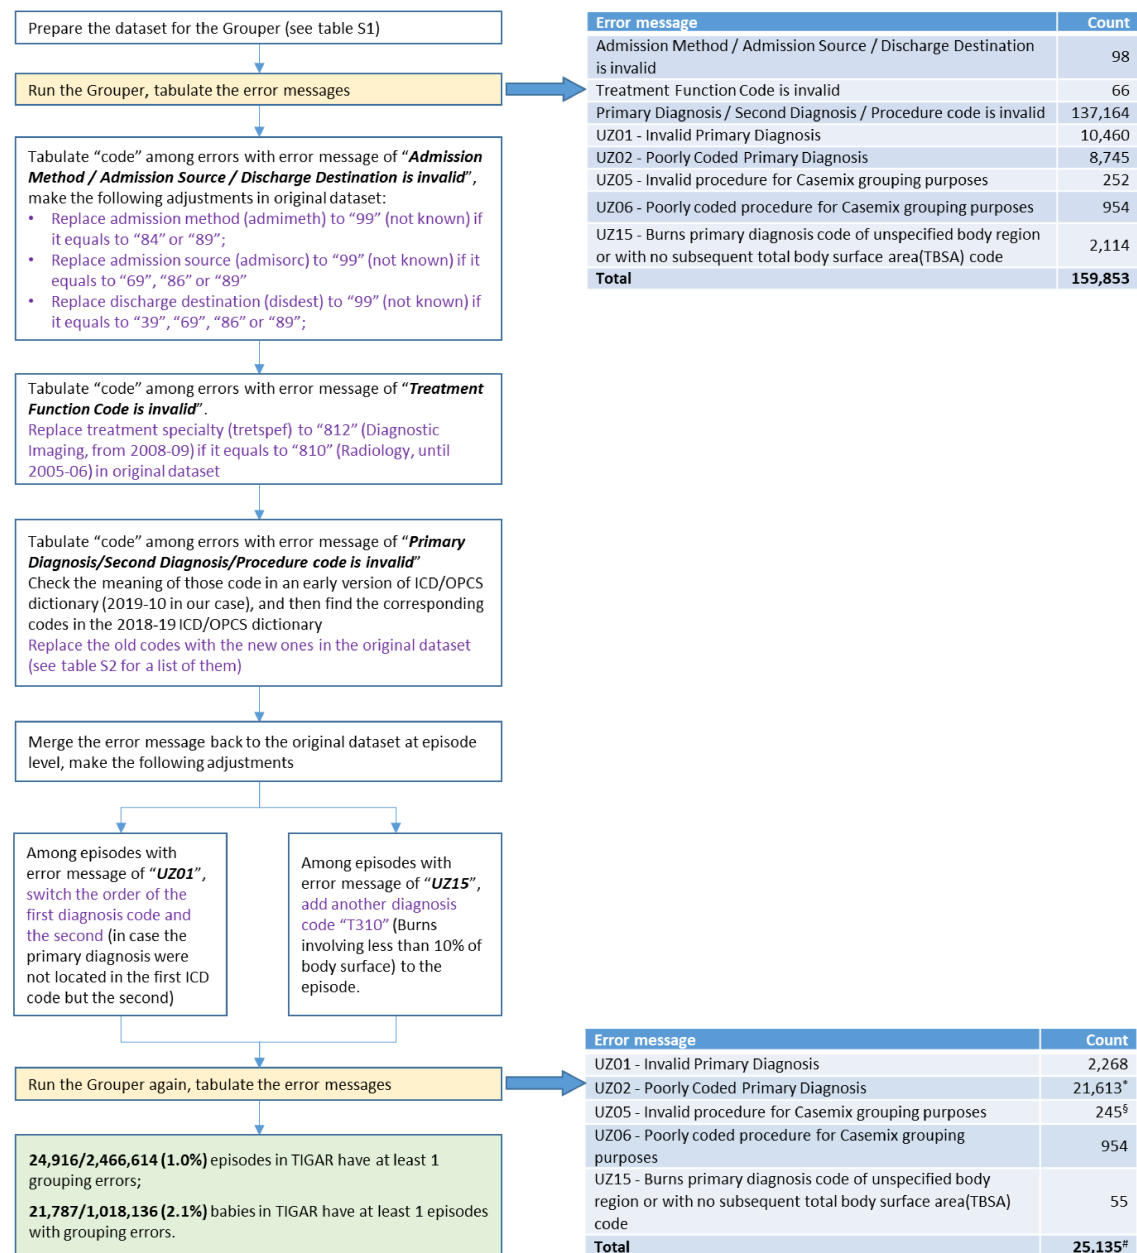

\*Number increased since more poorly coded (too vague) diagnosis were able to be recognized by Grouper after updated the old ICD codes to the new ones. For example "R69X" become able to be recognized by the Grouper after adapting from "R69", but it's too vague for the Grouper to allocate a HRG code for it (Unknown and unspecified causes of morbidity)

<sup>§</sup>Number slightly decreased since after updated the old procedure codes to new ones, some episodes got a related major procedure from one of the procedure codes

<sup>#</sup> Some episodes had more than one errors, so this number is larger than the total number of episodes with grouping errors

**Variables required for the 2018/19 Grouper**

| Variable     | Meaning                                                            |
|--------------|--------------------------------------------------------------------|
| PROCODET     | Provider code of treatment                                         |
| PROVSPNO     | Hospital provider spell number                                     |
| EPIORDER     | Episode order within the current spell                             |
| STARTAGE     | Age at start of episode (whole year rounded down)                  |
| SEX          | Sex of patient                                                     |
| CLASSPAT     | Patient classification (e.g. day cases, ordinary admissions, etc.) |
| ADMISORC     | Source of admission                                                |
| ADMIMETH     | Method of admission                                                |
| DISDEST      | Destination on discharge                                           |
| DISMETH      | Method of discharge                                                |
| EPIDUR       | Episode duration (days)                                            |
| MAINSPEF     | Main specialty                                                     |
| TRETSPEF     | Treatment specialty                                                |
| NEOCARE      | Neonatal level of care                                             |
| DIAG_01      | Primary diagnosis (ICD)                                            |
| DIAG_02 – NN | Secondary diagnosis (ICD)                                          |
| OPER_01 – NN | Procedure (OPCS)                                                   |

\*Critical care days is an optional field in the Grouper which can help to adjust the non-critical care episode duration. No episode level critical care days were available in our TIGAR data. We have left this field blank (presume 0 critical care days) when running the Grouper. Adjustment on birth admission non-critical care costs were made on baby level based on the simulated neonatal critical care days in birth admission (see Supplementary material 3 for details).

**Old diagnosis and procedure codes in TIGAR and the corresponding new codes**

| Invalid (old) codes<br>for 2018/19 Grouper | New codes<br>for 2018/19 Grouper | Invalid (old) codes<br>for 2018/19 Grouper | New codes<br>for 2018/19 Grouper |
|--------------------------------------------|----------------------------------|--------------------------------------------|----------------------------------|
| <i>ICD codes</i>                           |                                  |                                            |                                  |
| R69                                        | R69X                             | N62                                        | N62X                             |
| A09X                                       | A090                             | R71                                        | R71X                             |
| N180                                       | N185                             | A86                                        | A86X                             |
| D760                                       | C966                             | D67                                        | D67X                             |
| K350                                       | K352                             | I840                                       | K649                             |
| Q314                                       | Q315                             | I847                                       | K649                             |
| K359                                       | K358                             | L52                                        | L52X                             |
| R500                                       | R509                             | L80                                        | L80X                             |
| P38                                        | P38X                             | N188                                       | N182                             |
| P90                                        | P90X                             | R36                                        | R36X                             |
| R21                                        | R21X                             | R72                                        | R72X                             |
| R501                                       | R509                             | R95                                        | R959                             |
| I846                                       | K644                             | Z225                                       | Z228                             |
| K351                                       | K353                             | Z33                                        | Z33X                             |
| N47                                        | N47X                             | B07                                        | B07X                             |
| K85X                                       | K859                             | B49                                        | B49X                             |
| H547                                       | H549                             | B99                                        | B99X                             |
| C80X                                       | C809                             | C850                                       | C859                             |
| C961                                       | C968                             | D62                                        | D62X                             |
| I48X                                       | I489                             | D70                                        | D70X                             |
| I849                                       | K649                             | E58                                        | E58X                             |
| Q02                                        | Q02X                             | E86                                        | E86X                             |
| P77                                        | P77X                             | G01                                        | G01X                             |
| I845                                       | K649                             | G35                                        | G35X                             |

|      |      |      |      |
|------|------|------|------|
| R14  | R14X | G903 | G904 |
| L89X | L899 | I10  | I10X |
| R17  | R17X | I81  | I81X |
| D66  | D66X | I99  | I99X |
| L22  | L22X | J81  | J81X |
| M725 | M726 | J90  | J90X |
| R11  | R11X | L84  | L84X |
| R33  | R33X | L89  | L899 |
| N44  | N44X | L97  | L97X |
| I848 | K649 | N12  | N12X |
| P75  | P75X | N63  | N63X |
| P95  | P95X | N86  | N86X |
| Q356 | Q359 | P93  | P93X |
| I38  | I38X | R02  | R02X |
| I842 | K649 | R13  | R13X |
| I843 | K649 | R34  | R34X |
| R31  | R31X | R35  | R35X |
| D752 | D759 | R51  | R51X |
| H55  | H55X | R53  | R53X |
| A90X | A979 | R55  | R55X |
| C836 | C839 | R58  | R58X |
| J22  | J22X | R80  | R80X |
| P53  | P53X | R81  | R81X |
| R91  | R91X | R98  | R98X |
| R95X | R959 | T68  | T68X |
| I48  | I489 | Y69  | Y69X |
| L00  | L00X | Y95  | Y95X |
| N19  | N19X | Z21  | Z21X |
| P60  | P60X | U800 | U820 |
| R05  | R05X | U801 | U821 |
| R18  | R18X | U808 | U828 |
| A09  | A090 | U810 | U830 |
| B24  | B24X | U818 | U831 |
| D45  | D45X | U88X | U837 |
| I841 | K649 | U898 | U838 |
| I844 | K649 | U899 | U839 |
| M723 | M726 |      |      |

#### OPCS codes

|      |      |
|------|------|
| X632 | X674 |
| X633 | X677 |
| X634 | X674 |
| X642 | X682 |
| X643 | X683 |
| X648 | X688 |
| X649 | X689 |
| S522 | S521 |
| S524 | S523 |



**Supplemental material 3. Summary on Reference Cost matching**

1. Due to the delay in publishing the 2018/19 reference cost by the NHS Improvement, the reference costs we used in this study were drawn from schedules from the previous year (2017/18 reference costs). As a result, some HRGs generated by the 2018/19 Grouper Software cannot be found in the 2017/18 reference cost schedules. We have firstly detected these new HRGs in TIGAR and replaced them with the corresponding older ones:

| New HRGs in the 2018/19 Grouper | Corresponding old HRGs in 2017/18 |
|---------------------------------|-----------------------------------|
| AB25Z                           | AB17Z                             |
| AB26Z                           | AB17Z                             |
| AB27Z                           | AB19Z                             |
| AB28Z                           | AB19Z                             |
| BZ74Z                           | BZ74B                             |
| FF42Z                           | FF42B                             |
| LB81Z                           | LB29C / LB29D (based on age)      |
| RD60Z                           | RD28Z                             |

2. Matching the core HRGs to core HRG reference costs (2,466,614 episodes in total)

|                                                                                          |           |
|------------------------------------------------------------------------------------------|-----------|
| Matched by HRG, admission type and treatment specialty                                   | 1,403,649 |
| Matched by HRG, admission type                                                           | 254,450   |
| Matched by HRG only                                                                      | 1,288     |
| Attach a zero cost (PB03Z, LA97B, PB13A/B/C/D*)                                          | 782,311   |
| Attach a length of stay specific average cost for episodes with a grouping error (UZ01Z) | 24,916    |

\*For PB13A/B/C/D, attach zero cost at episode level and manually attach cystic fibrosis year of care currencies at baby level

3. Matching the core HRGs to excess bed day reference costs (2,466,614 episodes in total)

|                                                                                                                                                                                   |           |
|-----------------------------------------------------------------------------------------------------------------------------------------------------------------------------------|-----------|
| Episodes with no excess bed days (zero cost)                                                                                                                                      | 2,349,169 |
| Matched by HRG, admission type and treatment specialty                                                                                                                            | 71,764    |
| Matched by HRG, admission type                                                                                                                                                    | 35,381    |
| Matched by HRG only                                                                                                                                                               | 171       |
| Attach a zero cost (PB03Z, WF01A/WF02A, PB13A/B/C/D)                                                                                                                              | 10,120    |
| For some HRGs, there's no activities in the current year to the derive reference cost -- use reference cost in previous years (then inflate) / use reference cost for a close HRG | 9         |

4. Matching the unbundled HRGs to reference cost (113,027 unbundled HRGs generated in total)

|                                                                                                                |        |
|----------------------------------------------------------------------------------------------------------------|--------|
| Matched by HRG                                                                                                 | 98,354 |
| Attach a zero cost for episodes with a grouping error (UZ01Z)                                                  | 747    |
| High cost drugs with no reference cost at HRG level – use the weighted average cost across all high cost drugs | 13,926 |

**Supplementary materials 4. Statistics for subsequent admissions**

Length of stay in subsequent admissions (days) by year of follow-up and gestational age

|       |      | Year 1  | Year 2  | Year 3  | Year 4  | Year 5  | Year 6  | Year 7  | Year 8  |
|-------|------|---------|---------|---------|---------|---------|---------|---------|---------|
| <28   | n    | 1,730   | 1,710   | 1,705   | 1,701   | 1,697   | 1,695   | 1,695   | 1,691   |
|       | Mean | 6.8     | 3.2     | 1.5     | 1.0     | 0.6     | 0.5     | 0.4     | 0.5     |
|       | SD   | 18.2    | 17.7    | 9.1     | 5.8     | 4.7     | 4.7     | 3.8     | 7.2     |
| 28-29 | n    | 2,089   | 2,071   | 2,069   | 2,067   | 2,067   | 2,066   | 2,065   | 2,064   |
|       | Mean | 3.7     | 1.5     | 0.6     | 0.5     | 0.3     | 0.4     | 0.4     | 0.3     |
|       | SD   | 12.1    | 10.2    | 3.7     | 4.4     | 3.0     | 3.7     | 4.8     | 3.7     |
| 30-31 | n    | 3,227   | 3,218   | 3,217   | 3,214   | 3,213   | 3,212   | 3,211   | 3,211   |
|       | Mean | 2.6     | 0.7     | 0.5     | 0.3     | 0.3     | 0.3     | 0.2     | 0.3     |
|       | SD   | 8.6     | 3.9     | 6.0     | 2.2     | 2.8     | 3.8     | 2.2     | 4.1     |
| 32    | n    | 2,656   | 2,646   | 2,645   | 2,644   | 2,642   | 2,642   | 2,641   | 2,639   |
|       | Mean | 2.3     | 0.8     | 0.5     | 0.4     | 0.3     | 0.2     | 0.2     | 0.1     |
|       | SD   | 8.9     | 5.6     | 5.7     | 3.4     | 3.4     | 2.5     | 2.2     | 1.5     |
| 33    | n    | 4,050   | 4,026   | 4,021   | 4,018   | 4,017   | 4,016   | 4,015   | 4,015   |
|       | Mean | 1.6     | 0.7     | 0.3     | 0.2     | 0.2     | 0.2     | 0.1     | 0.1     |
|       | SD   | 8.1     | 5.4     | 3.2     | 2.2     | 1.8     | 1.3     | 0.9     | 0.8     |
| 34    | n    | 7,292   | 7,255   | 7,247   | 7,244   | 7,242   | 7,240   | 7,240   | 7,240   |
|       | Mean | 1.7     | 0.7     | 0.4     | 0.3     | 0.1     | 0.2     | 0.2     | 0.1     |
|       | SD   | 9.6     | 6.9     | 4.7     | 3.0     | 1.2     | 3.0     | 2.6     | 1.8     |
| 35    | n    | 11,663  | 11,614  | 11,601  | 11,593  | 11,590  | 11,588  | 11,588  | 11,583  |
|       | Mean | 1.3     | 0.5     | 0.3     | 0.2     | 0.2     | 0.2     | 0.1     | 0.2     |
|       | SD   | 8.6     | 5.2     | 3.2     | 2.5     | 3.2     | 2.7     | 2.7     | 3.9     |
| 36    | n    | 23,346  | 23,273  | 23,255  | 23,249  | 23,246  | 23,239  | 23,237  | 23,235  |
|       | Mean | 1.2     | 0.4     | 0.3     | 0.2     | 0.2     | 0.1     | 0.1     | 0.1     |
|       | SD   | 7.9     | 4.0     | 4.3     | 3.0     | 3.2     | 2.4     | 2.7     | 2.6     |
| 37    | n    | 54,001  | 53,889  | 53,865  | 53,845  | 53,836  | 53,824  | 53,818  | 53,812  |
|       | Mean | 0.9     | 0.3     | 0.2     | 0.2     | 0.1     | 0.1     | 0.1     | 0.1     |
|       | SD   | 5.6     | 3.4     | 2.5     | 2.9     | 1.8     | 2.0     | 1.4     | 2.2     |
| 38    | n    | 137,926 | 137,711 | 137,654 | 137,616 | 137,596 | 137,575 | 137,563 | 137,553 |
|       | Mean | 0.6     | 0.3     | 0.2     | 0.1     | 0.1     | 0.1     | 0.1     | 0.1     |
|       | SD   | 4.5     | 2.7     | 2.5     | 2.2     | 1.6     | 1.4     | 1.6     | 1.6     |
| 39    | n    | 231,376 | 231,150 | 231,072 | 231,028 | 230,993 | 230,970 | 230,950 | 230,932 |
|       | Mean | 0.5     | 0.2     | 0.1     | 0.1     | 0.1     | 0.1     | 0.1     | 0.1     |
|       | SD   | 3.9     | 2.4     | 1.9     | 1.5     | 1.6     | 1.7     | 1.4     | 1.4     |
| 40    | n    | 288,065 | 287,821 | 287,748 | 287,691 | 287,663 | 287,644 | 287,627 | 287,607 |
|       | Mean | 0.4     | 0.2     | 0.1     | 0.1     | 0.1     | 0.1     | 0.1     | 0.1     |
|       | SD   | 3.3     | 2.3     | 2.2     | 1.4     | 1.3     | 1.3     | 1.2     | 1.1     |
| 41    | n    | 208,757 | 208,576 | 208,528 | 208,501 | 208,480 | 208,460 | 208,447 | 208,436 |
|       | Mean | 0.4     | 0.2     | 0.1     | 0.1     | 0.1     | 0.1     | 0.1     | 0.1     |
|       | SD   | 3.0     | 2.2     | 1.8     | 1.5     | 1.4     | 1.2     | 1.3     | 1.3     |
| 42    | n    | 41,958  | 41,917  | 41,902  | 41,896  | 41,890  | 41,888  | 41,881  | 41,880  |
|       | Mean | 0.4     | 0.2     | 0.1     | 0.1     | 0.1     | 0.1     | 0.1     | 0.1     |
|       | SD   | 4.1     | 2.1     | 1.6     | 2.8     | 1.4     | 1.2     | 1.4     | 1.9     |

The TIGAR cohort excludes babies who died within their birth admission. As a result, for subsequent admissions all babies were alive at the beginning of the first year.
